# Supplementary material for: The Win–Win Effects of an Invasive Plant Biochar on a Soil–Crop System: Controlling a Bacterial Soilborne Disease and Stabilizing the Soil Microbial Community Network
Source: MDPI journal article supplement (doi:10.3390/microorganisms12030447), 2024-02-22
Supplement: s1 [file s1]

# The Win–Win Effects of an Invasive Plant Biochar on a Soil–Crop System: Controlling a Bacterial Soilborne Disease and Stabilizing the Soil Microbial Community Network

Sheng Wang <sup>1,2,3</sup>, Lei Wang <sup>1,2,3</sup>, Sicong Li <sup>1,2,3</sup>, Tiantian Zhang <sup>4</sup> and Kunzheng Cai <sup>1,2,3,\*</sup>

<sup>1</sup> College of Natural Resources and Environment, South China Agricultural University, Guangzhou 510642, China; wangsheng@stu.scau.edu.cn (S.W.); kishi218@163.com (L.W.); 2021lsc@stu.scau.edu.cn (S.L.)

<sup>2</sup> Key Laboratory of Tropical Agricultural Environment in South China, Ministry of Agriculture and Rural Affairs, South China Agricultural University, Guangzhou 510642, China

<sup>3</sup> Guangdong Provincial Key Laboratory of Eco-Circular Agriculture, South China Agricultural University, Guangzhou 510642, China

<sup>4</sup> College of Horticulture, South China Agricultural University, Guangzhou 510642, China; 17863608557@163.com

\* Correspondence: kzcai@scau.edu.cn; Tel.: +86-20-38297175

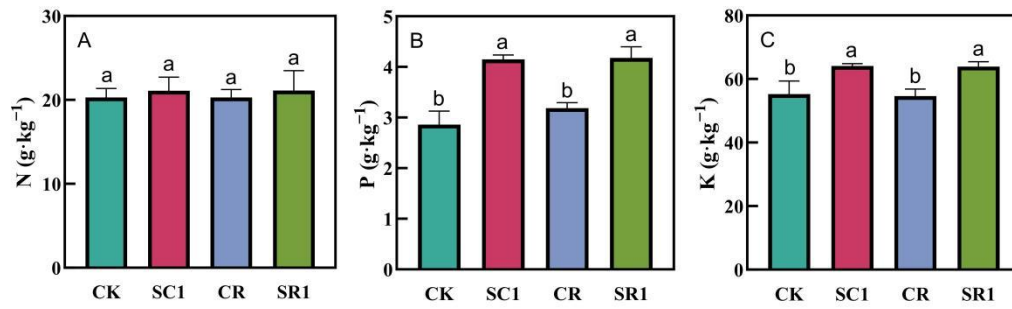

**Figure S1.** Effects of invasive plant biochar treatments on N(A), P(B) and K(C) uptake in tomato plants. CK, SC1 represent 0%, 1% biochar application without pathogen inoculation, respectively; CR, SR1 represent 0%, 1% biochar application with pathogen inoculation, respectively. All values are presented as the mean  $\pm$  standard error ( $n = 3$ ). Different letters in treatments indicate significant differences ( $P < 0.05$ ).

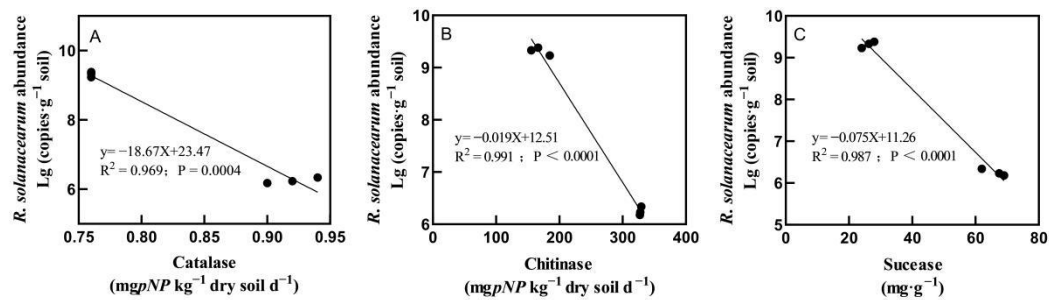

**Figure S2.** Correlation analysis of soil enzyme activities and the abundance of *R. solanacearum* in soil. Catalase (A), Chitinase (B), Sucrase (C).

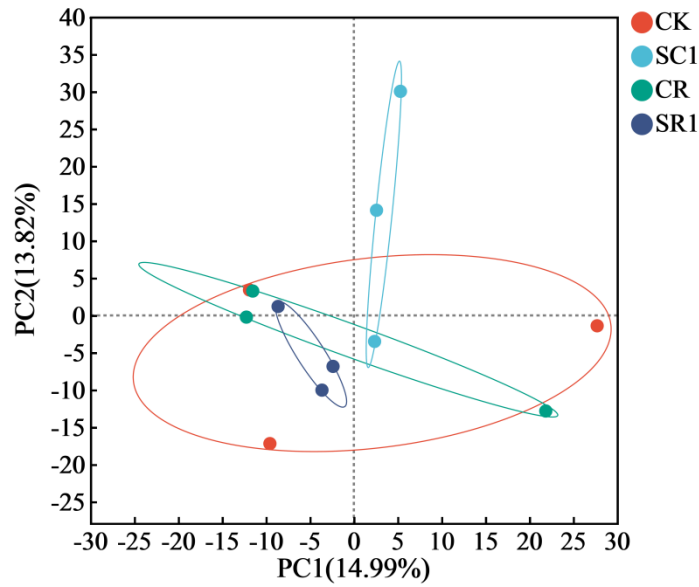

**Figure S3.** Effects of invasive plant biochar treatments on soil bacterial community structure. CK, SC1 represent 0%, 1% biochar application without pathogen inoculation, respectively; CR, SR1 represent 0%, 1% biochar application with pathogen inoculation, respectively.

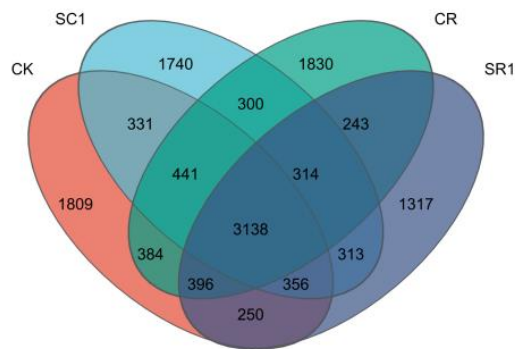

**Figure S4.** Effects of invasive plant biochar treatments on soil microbial diversity. CK, SC1 represent 0%, 1% biochar application without pathogen inoculation, respectively; CR, SR1 represent 0%, 1% biochar application with pathogen inoculation, respectively.

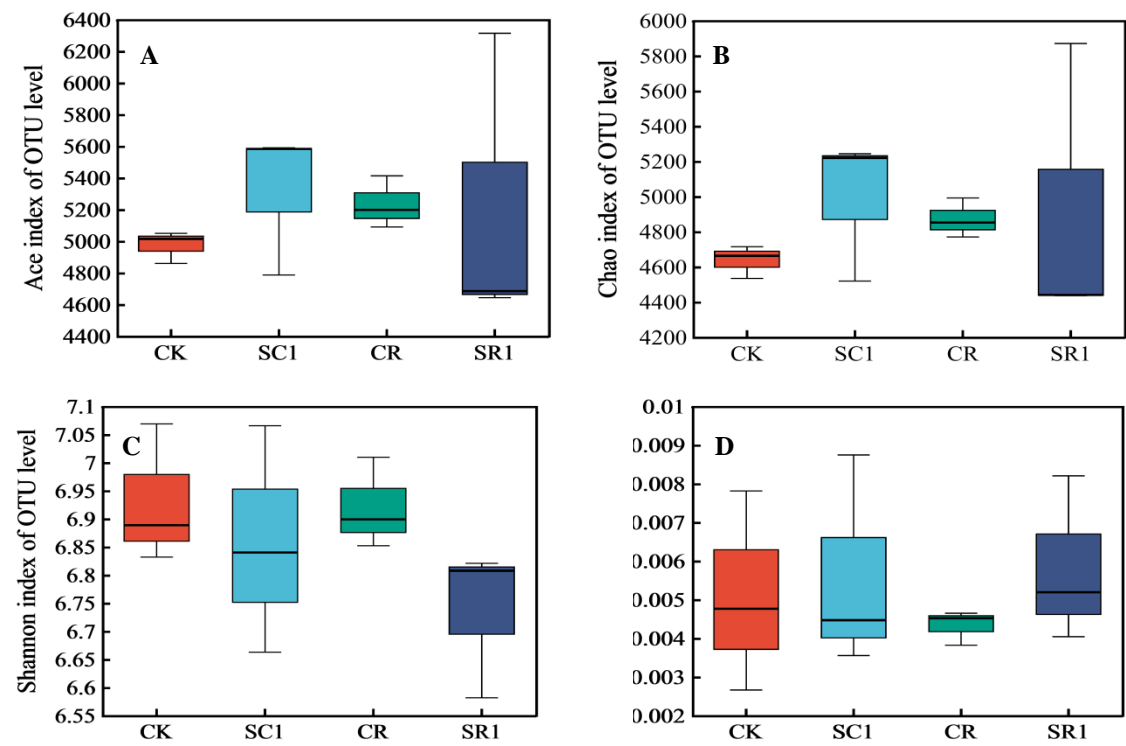

**Figure S5.** Effects of invasive plant biochar treatments on soil microbial diversity. Ace index (**A**), Chao index (**B**), Shannon index (**C**), Simpson index (**D**). CK, SC1 represent 0%, 1% biochar application without pathogen inoculation, respectively; CR, SR1 represent 0%, 1% biochar application with pathogen inoculation, respectively. All values are presented as the mean  $\pm$  standard error ( $n = 3$ ).
